# Supplementary material for: Identifying Frameworks for Validation and Monitoring of Consensual Behavioral Intervention Technologies: Narrative Review
Source: PubMed Central journal article supplement (PMC6822061; doi:10.2196/13606), 2019-10-16
Supplement: jmir_v21i10e13606_app1.pdf [file jmir_v21i10e13606_app1.pdf]

Multimedia Appendix 1: Table of frameworks.

| Framework              | Authors     | Publication year | Biblio                                                                                                                                                                           | Creator's Country | Organization having funded the creator                       | Organization having funded the creation of the framework itself | Focus                              | Target group                                                       | Design process (Linear, Iterative, Evolutive, Parallel, Incremental) | Early Implication of end users in the process? | Systematic Implication of end users in the process? | Categorization of the framework: P-MCES | Categorization of the paradigms |
|------------------------|-------------|------------------|----------------------------------------------------------------------------------------------------------------------------------------------------------------------------------|-------------------|--------------------------------------------------------------|-----------------------------------------------------------------|------------------------------------|--------------------------------------------------------------------|----------------------------------------------------------------------|------------------------------------------------|-----------------------------------------------------|-----------------------------------------|---------------------------------|
| Waterfall model        | Royce       | 1970             | Royce WW. Managing the development of large software systems. In: proceedings of IEEE WESCON. Los Angeles; 1970. p. 328–338                                                      | USA               | Lockheed Software Technology Center                          | None                                                            | Non-Health (software development)  | Not specified (software designers / development managers)          | Linear                                                               | No                                             | No                                                  | P                                       | Engineering paradigm            |
| PRECEDE-PROCEED model  | Green       | 1974             | Green LW. Toward cost-benefit evaluations of health education: some concepts, methods and examples. Health Education Monograph 1974;2(Suppl 2):34-64.                            | USA               | School of Hygiene and Public Health, John Hopkins University | None                                                            | Health (Health promotion programs) | Not specified (searchers, policy makers, health programs planners) | Iterative, Evolutive, Parallel                                       | No                                             | No                                                  | MCES                                    | Biomedical model                |
| Prototyping model      | Floyd       | 1984             | Floyd C. A systematic look at prototyping, in: Budde, R., Kuhlenskamp, K., Mathiassen, L. and Zullighoven, H. Approaches to Prototyping, Springer-Verlag: Heidelberg, 1-17.1984. | Germany           | Institut d'informatique appliquée                            | None                                                            | Non-Health (engineering)           | Software designers / development managers                          | Iterative, Evolutive                                                 | No                                             | No                                                  | P-S                                     | Engineering paradigm            |
| Greenwald and Cullen's | Greenwald & | 1985             | Greenwald P, Cullen JW. The new                                                                                                                                                  | USA               | Division of Cancer                                           | None                                                            | Health (Behavior)                  | Not specified (searchers, health                                   | Iterative                                                            | No                                             | No                                                  | MCES                                    | Biomedical model                |

|                                       |               |      |                                                                                                                                                                    |     |                                                                                     |                                                                                                                                                   |                                       |                                                           |                                |                             |                             |      |                      |  |
|---------------------------------------|---------------|------|--------------------------------------------------------------------------------------------------------------------------------------------------------------------|-----|-------------------------------------------------------------------------------------|---------------------------------------------------------------------------------------------------------------------------------------------------|---------------------------------------|-----------------------------------------------------------|--------------------------------|-----------------------------|-----------------------------|------|----------------------|--|
| 5-phase cancer control model          | Cullen        |      | emphasis in cancer control. Journal of the National Cancer Institute. 1985;74(3):543-551. 1985.                                                                    |     | Prevention and Control, Cancer Institute, NIH                                       |                                                                                                                                                   | change, cancer)                       | policy makers)                                            |                                |                             |                             |      |                      |  |
| Flay's 8-stage health promotion model | Flay          | 1986 | Flay BR. Efficacy and effectiveness trials (and other phases of research) in the development of health promotion programs. Prev Med. ;15(5):451-74. 1986.          | USA | Health Behavior Research Institute, University of Southern California               | NIH                                                                                                                                               | Health (Health promotion programs)    | Searchers, health policy makers                           | Iterative                      | No                          | No                          | MCES | Biomedical model     |  |
| V life cycle model                    | Rook          | 1986 | Rook P. Controlling software projects. Software Engineering Journal - Controlling software projects, vo.1, no.1, pp.7-16, 1986.                                    | UK  | GEC Software                                                                        | None                                                                                                                                              | Non-Health (software development)     | Software designers / development managers                 | Linear                         | Y (evaluation)              | Y (evaluation only)         | P-S  | Engineering paradigm |  |
| Spiral life cycle model               | Boehm         | 1988 | Boehm BW. A spiral model of software development and enhancement. Computer. mai 1988;21(5):61-72                                                                   | USA | TRW Defense Systems Group                                                           | None                                                                                                                                              | Non-Health (software development)     | Not specified (software designers / development managers) | Iterative, Evolutive           | No                          | No                          | P-S  | Engineering paradigm |  |
| Star life cycle model                 | Harston & Dix | 1989 | Harston HR, Hix D. Towards empirically derived methodologies and tools for HCI development. <i>International Journal of Man-Machine Studies</i> , 1989;31:477-494. | USA | Department of Computer Science, Virginia Polytechnic Institute and State University | National Science Foundation, IBM Federal Systems Division, the Software Productivity Consortium and the Virginia Center for Innovative Technology | Non-Health (human-computer interface) | Software designers / development managers                 | Iterative, Evolutive           | Y (analysis and evaluation) | Y (analysis and evaluation) | P-S  | Engineering paradigm |  |
| Rapid application development         | Martin        | 1991 | Martin J. Rapid Application Development. Macmillan. 1991                                                                                                           | UK  | IBM                                                                                 | None                                                                                                                                              | Non-Health (software development)     | Designers, software development managers                  | Iterative, Evolutive, Parallel | Y (analysis and evaluation) | Y (analysis and evaluation) | P-S  | Engineering          |  |

|                                  |                           |      |                                                                                                                                                                                                                                                                            |     |                                                                                                 |      |                                       |                                                           |                                 |                             |                             |      |                                          |
|----------------------------------|---------------------------|------|----------------------------------------------------------------------------------------------------------------------------------------------------------------------------------------------------------------------------------------------------------------------------|-----|-------------------------------------------------------------------------------------------------|------|---------------------------------------|-----------------------------------------------------------|---------------------------------|-----------------------------|-----------------------------|------|------------------------------------------|
| NIDA's stage model               | Onken <i>et al.</i>       | 1997 | (LIVRE)<br>Onken LS, Blaine JD, Battjes RJ. Behavioral therapy research: A conceptualization of a process. In:Henggeler SW, Santos AB,editors. Innovative approaches for difficult-to-treat populations. Washington,D.C.: American Psychiatric Press, Inc. p.477-85. 1997. | USA | National Institute on Drug Abuse (NIH)                                                          | NIH  | Health (Behavior change,drug abuse)   | Not specified (researchers, health policy makers)         | Iterative, Evolutive            | n)<br>No                    | n)<br>No                    | MCES | Biomedical model, Psychological paradigm |
| Intervention mapping             | Bartholomew <i>et al.</i> | 1998 | Bartholomew LK, Parcel GS, Kok G. Intervention mapping: a process for developing theory- and evidence-based health education programs. Health Educ Behav. oct 1998;25(5):545-63.                                                                                           | USA | Center for Health Promotion Research and Development, University of Teras Health Science Center | None | Health (health promotion programs)    | Health education program planners                         | Iterative, Evolutive            | No                          | No                          | MCES | Behavioral theory                        |
| Usability Engineering Life Cycle | Mayhew                    | 1999 | Mayhew D. The usability engineering lifecycle: a practitioner's handbook for user interface design (LIVRE)                                                                                                                                                                 | USA | Northeastern university                                                                         | None | Non-Health (human-computer interface) | Designers, software development managers                  | Iterative, Evolutive            | Y (analysis and evaluation) | Y (analysis and evaluation) | P-S  | Engineering paradigm                     |
| Agile software management        | Beck <i>et al.</i>        | 2001 | Beck K, Beedle M, Bennekum A, Cockburn A, Cunningham W, Fowler M, Grenning J, Highsmith J, Hunt A, Jeffries R, Kern J, Marick B, Martin R, Mellor S, Schwaber K, Sutherland J, Thomas D.                                                                                   | USA | Chrysler/Face book                                                                              | None | Non-Health (software development)     | Not specified (software designers / development managers) | Iterative, Evolutive , Parallel | Y (analysis and evaluation) | Y (analysis and evaluation) | P-S  | Engineering paradigm                     |

|                                                       |                       |      |                                                                                                                                                                                                                                        |        |                                                                                                                       |                                                                                               |                                      |                                                                                              |                                |                             |                             |        |                                                                |
|-------------------------------------------------------|-----------------------|------|----------------------------------------------------------------------------------------------------------------------------------------------------------------------------------------------------------------------------------------|--------|-----------------------------------------------------------------------------------------------------------------------|-----------------------------------------------------------------------------------------------|--------------------------------------|----------------------------------------------------------------------------------------------|--------------------------------|-----------------------------|-----------------------------|--------|----------------------------------------------------------------|
|                                                       |                       |      | Manifesto for Agile software development. www.agilemanifesto.org. 2001                                                                                                                                                                 |        |                                                                                                                       |                                                                                               |                                      |                                                                                              |                                |                             |                             |        |                                                                |
| IT implementation framework                           | Kukafka <i>et al.</i> | 2003 | Kukafka R, Johnson SB, Linfante A, Allegrante JP. Grounding a new information technology implementation framework in behavioral science: a systematic analysis of the literature on IT use. <i>J Biomed Inform.</i> 2003;36(3):218-27. | USA    | Department of sociomedical sciences, Joseph Mailman School of Public Health, Columbia University                      | None                                                                                          | Health (Behavior change, ehealth)    | Behavior change intervention designers using information technologies                        | Iterative, Evolutive, Parallel | No                          | No                          | P-MCES | Biomedical model, Psychological paradigm, Engineering paradigm |
| Multiphase Optimization Strategy (MOST)               | Collins <i>et al.</i> | 2005 | Collins LM, Murphy SA, Nair VN, Strecher VJ. A strategy for optimizing and evaluating behavioral interventions. <i>Annals of Behavioral Medicine.</i> 2005;30(1):65-73.                                                                | UK     | Methodology Center, Department of Human Development and Family Studies, Pennsylvania State University                 | NIH, National Science Foundation                                                              | Health (Behavior change)             | Intervention researchers, intervention targets, health care providers and other stakeholders | Iterative                      | No                          | No                          | MCE    | Biomedical model, Psychological paradigm, Engineering paradigm |
| "Framework for evaluating emergent eHealth resources" | Pagliari              | 2007 | Pagliari C. Design and evaluation in eHealth: challenges and implications for an interdisciplinary field. <i>J Med Internet Res.</i> 2007;9(2):e15.                                                                                    | UK     | EHealth Interdisciplinary Research Group, University of Edinburgh                                                     | None                                                                                          | Health (Behavior change, eHealth)    | Software developers and health services researchers                                          | Iterative, Evolutive           | Y (analysis and evaluation) | Y (analysis and evaluation) | P-MCES | Biomedical model, Engineering paradigm                         |
| CONSORT Statement for Nonpharmacologic Treatments     | Boutron <i>et al.</i> | 2008 | Boutron I, Moher D, Altman DG, Schulz KF, Ravaud P. Methods and processes of the CONSORT Group: example of an extension for trials assessing nonpharmacologic                                                                          | France | Department of Biostatistical Epidemiology and Clinical Research, INSERM U738, Université Paris 7 Denis Diderot/Bichat | Département de la Recherche Clinique et du Développement, Assistance Publique des Hôpitaux de | Health (Nonpharmacologic treatments) | Researchers (Journal authors), journal editors                                               | Iterative                      | No                          | No                          | MCES   | Biomedical model                                               |

|                                            |                                 |      |                                                                                                                                                                                                                            |             |                                                                      |                                                                                                                                                      |                                   |                                                                                                             |                                |                             |                             |      |                                          |
|--------------------------------------------|---------------------------------|------|----------------------------------------------------------------------------------------------------------------------------------------------------------------------------------------------------------------------------|-------------|----------------------------------------------------------------------|------------------------------------------------------------------------------------------------------------------------------------------------------|-----------------------------------|-------------------------------------------------------------------------------------------------------------|--------------------------------|-----------------------------|-----------------------------|------|------------------------------------------|
|                                            |                                 |      | treatments. <i>Annals of Internal Medicine</i> . 2008;148(4):W-60.                                                                                                                                                         |             | -Claude Bernard Hospital                                             | Paris; Department of Biostatistical Epidemiology and Clinical Research, INSERM U738, Université Paris 7 Denis Diderot/Bichat-Claude Bernard Hospital |                                   |                                                                                                             |                                |                             |                             |      |                                          |
| Iterative and incremental model            | Cockburn                        | 2008 | Cockburn A. Using both incremental and iterative development STSC Cross Talk, 21(5),27-30. 2008                                                                                                                            | USA         | Companies (IBM)                                                      | None                                                                                                                                                 | Non-Health (Software development) | Development teams, development managers                                                                     | Iterative, Evolutive, Parallel | No                          | No                          | P-S  | Engineering paradigm                     |
| MRC Complex intervention                   | Craig <i>et al.</i>             | 2008 | Craig, P., Dieppe, P., Macintyre, S., Michie, S., Nazareth, L., Petticrew, M. Developing and evaluating complex interventions: the new Medical Research Council guidance. <i>British Medical Journal</i> . 2008;337, a1655 | UK          | Medical Research Council Population Health Sciences Research Network | Medical Research Council Health Services and Public Health Research Board                                                                            | Health (complex interventions)    | Researchers, research funders, policy makers, practitioners and other commissioners and users of evaluation | Iterative, Evolutive           | No                          | No                          | MCES | Biomedical model, Psychological paradigm |
| "EHealth interventions evaluation process" | Catwell & Sheikh                | 2009 | Catwell L, Sheikh A. Evaluating eHealth interventions: the need for continuous systemic evaluation. <i>PLoS Med</i> . 2009;6(8):e1000126                                                                                   | UK          | Center for Population Health Sciences, University of Edinburgh       | NHS Connecting for Health Evaluation Programme                                                                                                       | Health (Behavior change, ehealth) | Information Communication Technology developers                                                             | Iterative, Evolutive           | Y (analysis and evaluation) | Y (analysis and evaluation) | P-S  | Engineering paradigm                     |
| Center for eHealth Research (CeHRes)       | Van Gemert-Pijnen <i>et al.</i> | 2011 | van Gemert-Pijnen JE, Nijland N, van Limburg M, Ossebaard HC,                                                                                                                                                              | Netherlands | Department of Psychology, Health and Technology/C                    | None                                                                                                                                                 | Health (Behavior change, eHealth) | ehealth developers                                                                                          | Iterative, Evolutive           | Y (analysis and evaluation) | Y (analysis and evaluation) | P-S  | Engineering paradigm                     |

|                                                     |                  |      |                                                                                                                                                                                                                                                                                                                                                                                        |        |                                                                                                                                                                                                |                    |                                   |                                                |                      |    |    |        |                        |
|-----------------------------------------------------|------------------|------|----------------------------------------------------------------------------------------------------------------------------------------------------------------------------------------------------------------------------------------------------------------------------------------------------------------------------------------------------------------------------------------|--------|------------------------------------------------------------------------------------------------------------------------------------------------------------------------------------------------|--------------------|-----------------------------------|------------------------------------------------|----------------------|----|----|--------|------------------------|
| roadmap for the development of eHealth technologies |                  |      | Kelders SM, Eysenbach G, et al. A Holistic Framework to Improve the Uptake and Impact of eHealth Technologies. Journal of Medical Internet Research. 13 déc 2011;13(4):e111.                                                                                                                                                                                                           |        | enter for eHealth Research and Disease Management, Faculty of Behavioural Sciences, University of Twente                                                                                       |                    |                                   |                                                |                      | n) | n) |        |                        |
| The Behavior Change Wheel                           | Michie et al.    | 2011 | Michie S, van Stralen MM, West R. The behaviour change wheel: a new method for characterising and designing behaviour change interventions. Implement Sci. 2011;6:42.                                                                                                                                                                                                                  | UK     | Research Department of Clinical, Educational, and Health Psychology, University College London.                                                                                                | Cancer Research UK | Health (Behavior change)          | Behavior change intervention designers         | Iterative, Evolutive | No | No | M      | Psychological paradigm |
| CONSORT ehealth                                     | Eysenbach et al. | 2011 | Eysenbach G, Group C-E. CONSORT-EHEALTH: improving and standardizing evaluation reports of Web-based and mobile health interventions. J Med Internet Res. 2011;13(4):e126. Eysenbach G. CONSORT-EHEALTH: implementation of a checklist for authors and editors to improve reporting of web-based and mobile randomized controlled trials. Stud Health Technol Inform. 2013;192:657-61. | Canada | University Health Network, Center for Global eHealth Innovation & Techna Institute, Toronto/ Institute for Health Policy, Management, and Evaluation, University of Toronto/ JMIR Publications | None               | Health (Behavior change, ehealth) | Researchers (Journal authors), journal editors | Linear, Iterative    | No | No | P-MCES | Biomedical model       |

|                                                                                            |                         |      |                                                                                                                                                                                                                                                                           |             |                                                                                                                                                                |                                                                                                                                                                                                                                                                          |                                  |                                                                   |           |                             |                             |        |                                                                |
|--------------------------------------------------------------------------------------------|-------------------------|------|---------------------------------------------------------------------------------------------------------------------------------------------------------------------------------------------------------------------------------------------------------------------------|-------------|----------------------------------------------------------------------------------------------------------------------------------------------------------------|--------------------------------------------------------------------------------------------------------------------------------------------------------------------------------------------------------------------------------------------------------------------------|----------------------------------|-------------------------------------------------------------------|-----------|-----------------------------|-----------------------------|--------|----------------------------------------------------------------|
| mHealth Development and Evaluation Framework                                               | Whittaker <i>et al.</i> | 2012 | Whittaker R, Merry S, Dorey E, Maddison R. A Development and evaluation process for mHealth interventions: Examples from New Zealand. <i>J Health Com</i> 2012;17:11-21.                                                                                                  | New Zealand | Clinical Trials Research Unit, University of Auckland                                                                                                          | the Health Research Council of New Zealand, Oakley Mental Health Foundation, University of Auckland, Digital Strategy Community Partnership Fund, Vodafone New Zealand Ltd, Auckland UniServices Ltd, National Heart Foundation, Cancer Society of New Zealand, Alcatel. | Health (Behavior change,mHealth) | Not specified (mHealth intervention developers and/or evaluators) | Iterative | Y (analysis and evaluation) | Y (analysis and evaluation) | P-MCES | Biomedical model, Psychological paradigm, Engineering paradigm |
| Explore Values, Operationalize and Learn, and eValue Efficacy (EVOLVE) mixed-methods model | Peterson <i>et al.</i>  | 2013 | Peterson JC, Czajkowski S, Charlson ME, Link AR, Wells MT, Isen AM, et al. Translating basic behavioral and social science research to clinical application: The EVOLVE mixed methods approach. <i>Journal of Consulting and Clinical Psychology</i> . 2013;81(2):217-30. | USA         | Division of Clinical Epidemiology and Evaluative Sciences Research, Department of Medicine, and Center for Integrative Medicine, Weill Cornell Medical College | NIH                                                                                                                                                                                                                                                                      | Health (Behavior change)         | Researchers                                                       | Iterative | Y (analysis and evaluation) | Y (analysis and evaluation) | MCE    | Biomedical model, Psychological paradigm                       |
| Development process of                                                                     | Riiser <i>et al.</i>    | 2013 | Riiser K, Løndal K, Ommundsen Y,                                                                                                                                                                                                                                          | Norway      | Oslo and Akershus                                                                                                                                              | Norwegian ExtraFounda                                                                                                                                                                                                                                                    | Health (internet)                | Researchers, designers,                                           | Iterative | Y (analysis)                | Y (analysis)                | P-MC   | Psychological paradigm,                                        |

|                                         |                              |      |                                                                                                                                                                                                                                                                                                    |             |                                                                                                                       |                                                                                                                 |                                                                   |                                                                                       |                                |                             |                             |        |                                                                |
|-----------------------------------------|------------------------------|------|----------------------------------------------------------------------------------------------------------------------------------------------------------------------------------------------------------------------------------------------------------------------------------------------------|-------------|-----------------------------------------------------------------------------------------------------------------------|-----------------------------------------------------------------------------------------------------------------|-------------------------------------------------------------------|---------------------------------------------------------------------------------------|--------------------------------|-----------------------------|-----------------------------|--------|----------------------------------------------------------------|
| Young & Active                          |                              |      | Sundar T, Helseth S. Development and Usability Testing of an Internet Intervention to Increase Physical Activity in Overweight Adolescents. <i>JMIR Res Protoc</i> 2013;2(1):e7                                                                                                                    |             | University College of Applied Sciences, Oslo                                                                          | tion for Health and Rehabilitation                                                                              | intervention, increase physical activity, overweight adolescents) | developers, and representatives from the target group                                 |                                | and evaluation)             | and evaluation)             |        | Engineering paradigm                                           |
| It's LiFe! User-centered design process | Van der Weegen <i>et al.</i> | 2013 | Van der Weegen S, Verwey R, Spreeuwenberg M, Tange H, van der Weijden T, de Witte L. The development of a mobile monitoring and feedback tool to stimulate physical activity of people with a chronic disease in primary care: a user-centered design. <i>JMIR Mhealth Uhealth</i> . 2013;1(2):e8. | Netherlands | CAPHRI School for Public Health and Primary Care, Departement of Health Services Research, Maastrich University       | Netherlands Organization for Health Research and Development                                                    | Health (Behavior change, chonic disease, ehealth)                 | Researchers                                                                           | Iterative                      | Y (analysis and evaluation) | Y (analysis and evaluation) | P-MCES | Biomedical model, Psychological paradigm, Engineering paradigm |
| DoTTI Development Framework             | Smits <i>et al.</i>          | 2014 | Smits R, Bryant J, Sanson-Fisher R, Tzelepis F, Henskens F, Paul C, et al. Tailored and integrated Web-based tools for improving psychosocial outcomes of cancer patients: the DoTTI development framework. <i>J Med Internet Res</i> . 2014;16(3):e76.                                            | Australia   | Priority Research Centre for Health Behaviour, University of Newcastle & Hunter Medical Research Institute, Callaghan | New South Wales Cancer Institute Translational Health Services, Cancer Council NSW, Australian Research Council | Health (Behavior change, ehealth, cancer)                         | Stakeholders (including researchers, clinicians, consumers, and programmers)          | Iterative, Evolutive, Parallel | Y (analysis and evaluation) | Y (analysis and evaluation) | P-MCES | Biomedical model, Psychological paradigm, Engineering paradigm |
| NIH Stage model                         | Onken <i>et al.</i>          | 2014 | Onken LS, Carroll KM, Shoham V, Cuthbert BN, Riddle M. Reenvisioning Clinical Science:                                                                                                                                                                                                             | USA         | National Institute on Drug Abuse (NIH)                                                                                | NIH                                                                                                             | Health (Clinical science)                                         | Researchers and students to learn how to conduct research in every domain of clinical | Iterative, Evolutive           | No                          | No                          | MCES   | Biomedical model, Psychological paradigm                       |

|                                               |                            |      |                                                                                                                                                                                                                                                                 |     |                                                                                                                                           |                                                                                  |                                                  |                                          |                                |                             |                             |      |                                              |
|-----------------------------------------------|----------------------------|------|-----------------------------------------------------------------------------------------------------------------------------------------------------------------------------------------------------------------------------------------------------------------|-----|-------------------------------------------------------------------------------------------------------------------------------------------|----------------------------------------------------------------------------------|--------------------------------------------------|------------------------------------------|--------------------------------|-----------------------------|-----------------------------|------|----------------------------------------------|
|                                               |                            |      | Unifying the Discipline to Improve the Public Health. Clin Psychol Sci. 2014;2(1):22-34.                                                                                                                                                                        |     |                                                                                                                                           |                                                                                  |                                                  | science                                  |                                |                             |                             |      |                                              |
| Behavioral Intervention Technology Model      | Mohr <i>et al.</i>         | 2014 | Mohr DC, Schueller SM, Montague E, Burns MN, Rashidi P. The Behavioral Intervention Technology Model: An Integrated Conceptual and Technological Framework for eHealth and mHealth Interventions. Journal of Medical Internet Research. 5 juin 2014;16(6):e146. | USA | Center for Behavioral Intervention Technologies, Department of Preventive Medicine, Northwestern University                               | NIH                                                                              | Health (Behavior change, ehealth)                | Designers, software development managers | Iterative                      | No                          | No                          | P-M  | Psychological paradigm, Engineering paradigm |
| 5-Step Content Validity Process               | Kassam-Adams <i>et al.</i> | 2015 | Kassam-Adams N, Marsac ML, Kohser KL, Kenardy JA, March S, Winston FK. A New Method for Assessing Content Validity in Model-Based Creation and Iteration of eHealth Interventions. J Med Internet Res 2015;17(4):e95                                            | USA | University of Pennsylvania, Philadelphia                                                                                                  | Eunice Kennedy Schriver National Institute of Child Health and Human Development | Health (eHealth)                                 | Researchers, Developers, users           | Iterative, Evolutive, Parallel | Y (analysis and evaluation) | Y (analysis and evaluation) | P-MC | Psychological paradigm, Engineering paradigm |
| Steps for developing a text messaging program | Abroms <i>et al.</i>       | 2015 | Abroms LC, Whittaker R, Free C, Mendel Van Alstyne J, Schindler-Ruwisch JM. Developing and Pretesting a Text Messaging Program for Health Behavior Change: Recommended Steps. JMIR                                                                              | USA | The Milken Institute School of Public Health, The George Washington University, Washington, DC; National Institute for Health Innovation, | None                                                                             | Health (Behavior change, text-messaging program) | Designers, Researchers                   | Iterative, Evolutive           | Y (analysis and evaluation) | Y (analysis and evaluation) | P-MC | Psychological paradigm, Engineering paradigm |

|                         |                           |      |                                                                                                                                                                                                                                                                                                                                     |     |                                                                                                                   |                                                    |                                            |                                                |                      |                             |                             |        |                                                                |
|-------------------------|---------------------------|------|-------------------------------------------------------------------------------------------------------------------------------------------------------------------------------------------------------------------------------------------------------------------------------------------------------------------------------------|-----|-------------------------------------------------------------------------------------------------------------------|----------------------------------------------------|--------------------------------------------|------------------------------------------------|----------------------|-----------------------------|-----------------------------|--------|----------------------------------------------------------------|
|                         |                           |      | Mhealth Uhealth. 2015;3(4):e107.                                                                                                                                                                                                                                                                                                    |     | The University of Auckland; Clinical Trials Research Unit, London School of Hygiene and Tropical Medicine, London |                                                    |                                            |                                                |                      |                             |                             |        |                                                                |
| Person-based approach   | Yardley <i>et al.</i>     | 2015 | Yardley L, Morrison L, Bradbury K, Muller I. The Person-Based Approach to Intervention Development: Application to Digital Health-Related Behavior Change Interventions. Journal of Medical Internet Research. 30 janv 2015 ;17(1) :e30.                                                                                            | UK  | Department of Psychology, Faculty of Social and Human Sciences, University of Southampton                         | Engineering and Physical Sciences Research Council | Health (Behavior change, ehealth)          | Behavior change intervention designers         | Iterative            | Y (analysis and evaluation) | Y (analysis and evaluation) | P-MCES | Biomedical model, Psychological paradigm, Engineering paradigm |
| ORBIT Model             | Czajkowski <i>et al.</i>  | 2015 | Czajkowski, S.M., Powell, L.H., Adler, N., Naar-King, S., Reynolds, K.D., Hunter, C.M., Laraia, B., Olster, D.H., Perna, F.M., Peterson, J.C., Epel, E., Boyington, J.E., Charlson, M.E. (2015). From Ideas to Efficacy: The ORBIT model for developing behavioral treatments for chronic diseases. Health Psychology, 10, 971-982. | USA | National Heart, Lung, and Blood Institute,NIH                                                                     | NIH                                                | Health (Behavior change, chronic diseases) | Behavior change intervention designers         | Iterative            | Y (analysis and evaluation) | Y (analysis and evaluation) | MCES   | Biomedical model, Psychological paradigm, Engineering paradigm |
| Pragmatic Framework for | Nahum-Shani <i>et al.</i> | 2015 | Nahum-Shani I, Hekler EB, Spruijt-Metz D. Building                                                                                                                                                                                                                                                                                  | USA | Institute for Social Research,                                                                                    | NIH                                                | Health (Behavior change, JITAI)            | Behavior change intervention designers (JITAI) | Iterative, Evolutive | No                          | No                          | M      | Psychological paradigm                                         |

|                                                        |                         |      |                                                                                                                                                                                                                                              |     |                                                                                                                                    |                                                                                |                                                 |                                                   |                                |                             |                             |        |                                                                |
|--------------------------------------------------------|-------------------------|------|----------------------------------------------------------------------------------------------------------------------------------------------------------------------------------------------------------------------------------------------|-----|------------------------------------------------------------------------------------------------------------------------------------|--------------------------------------------------------------------------------|-------------------------------------------------|---------------------------------------------------|--------------------------------|-----------------------------|-----------------------------|--------|----------------------------------------------------------------|
| Developing JITAs                                       |                         |      | health behavior models to guide the development of just-in-time adaptive interventions: A pragmatic framework. <i>Health Psychology</i> . 2015 ;34(Suppl) :1209-19.                                                                          |     | University of Michigan                                                                                                             |                                                                                |                                                 |                                                   |                                |                             |                             |        |                                                                |
| Telehealth in Chronic disease (TECH) conceptual model  | Salisbury <i>et al.</i> | 2015 | Salisbury C, Thomas C, O’Cathain A, Rogers A, Pope C, Yardley L, et al. Telehealth in Chronic disease: mixed-methods study to develop the TECH conceptual model for intervention design and evaluation. <i>BMJ open</i> . 2015;5(2):e006448. | UK  | University of Bristol, Centre for Academic Primary Care, School of Social and Community Medicine                                   | National Institute for Health Research (NIHR)                                  | Health (Behavior change, ehealth)               | Designers and evaluators of telehealth programmes | Iterative, Evolutive, Parallel | Y (analysis and evaluation) | Y (analysis and evaluation) | P-MCES | Biomedical model, Psychological paradigm, Engineering paradigm |
| NIATx Model                                            | Gustafson <i>et al.</i> | 2016 | Gustafson DH Jr, Maus A, Judkins J, Dinauer S, Isham A, Johnson R, Landucci G, Atwood AK. Using the NIATx Model to Implement User-Centered Design of Technology for Older Adults. <i>JMIR Hum Factors</i> 2016;3(1):e2                       | USA | Center for Health Enhancement Systems Studies, Department of Industrial and Systems Engineering, University of Wisconsin - Madison | Agency for Healthcare Research and Quality, Epic Systems Corporation           | Health (Behavior change, ehealth, older adults) | Designer, developers                              | Iterative, Evolutive, Parallel | Y (analysis and evaluation) | Y (analysis and evaluation) | P-M    | Psychological paradigm, Engineering paradigm                   |
| Integrate, Design, Assess, and Share (IDEAS) Framework | Mummah <i>et al.</i>    | 2016 | Mummah SA, Robinson TN, King AC, Gardner CD, Sutton S. IDEAS (Integrate, Design, Assess, and Share): A Framework and Toolkit of Strategies for the Development of More Effective                                                             | USA | Stanford Prevention Research Center, Department of Medicine, Stanford University School of Medicine and                            | NIH, Nutrition Science Initiative and Stanford Child Health Research Institute | Health (Behavior change, ehealth)               | Investigators and industry partners               | Iterative                      | Y (analysis and evaluation) | Y (analysis and evaluation) | P-MCES | Biomedical model, Psychological paradigm, Engineering paradigm |

|                                                           |                           |      |                                                                                                                                                                                                                                                                         |         |                                                                                |                                                                                                                   |                                                          |                                                     |                      |                             |                             |       |                                                                |
|-----------------------------------------------------------|---------------------------|------|-------------------------------------------------------------------------------------------------------------------------------------------------------------------------------------------------------------------------------------------------------------------------|---------|--------------------------------------------------------------------------------|-------------------------------------------------------------------------------------------------------------------|----------------------------------------------------------|-----------------------------------------------------|----------------------|-----------------------------|-----------------------------|-------|----------------------------------------------------------------|
|                                                           |                           |      | Digital Interventions to Change Health Behavior. J Med Internet Res. 16 déc 2016;18(12):e317.                                                                                                                                                                           |         | Behavioural Science Group, Institute of Public Health, University of Cambridge |                                                                                                                   |                                                          |                                                     |                      |                             |                             |       |                                                                |
| Chronic Disease mHealth App Intervention Design Framework | Wilhide III <i>et al.</i> | 2016 | Wilhide III CC, Peeples MM, Anthony Kouyaté RC. Evidence-Based mHealth Chronic Disease Mobile App Intervention Design: Development of a Framework. JMIR Research Protocols. 16 févr 2016;5(1):e25.                                                                      | USA     | WellDoc Inc                                                                    | None                                                                                                              | Health (Behavior change, mHealth apps, chronic diseases) | Researchers, practitioners, health care policy      | Iterative, Evolutive | Y (analysis and evaluation) | Y (analysis and evaluation) | P-M   | Psychological paradigm, Engineering paradigm                   |
| Three-Phase Human-Centered Design Methodology             | Harte <i>et al.</i>       | 2017 | Harte R, Glynn L, Rodriguez-Molinero A, Baker PM, Scharf T, Quinlan LR, et al. A Human-Centered Design Methodology to Enhance the Usability, Human Factors, and User Experience of Connected Health Systems: A Three-Phase Methodology. JMIR Hum Factors. 2017;4(1):e8. | Ireland | National University of Ireland Galway                                          | EU's Seventh Framework Programme for Research                                                                     | Non-Health (engineering)                                 | Designers, researchers, policy makers, users        | Iterative Evolutive  | Y (analysis and evaluation) | Y (analysis and evaluation) | P-S   | Engineering paradigm                                           |
| DREAM-GLOBAL Framework                                    | Maar <i>et al.</i>        | 2017 | Maar MA, Yeates K, Perkins N, Boesch L, Hua-Stewart D, Liu P, et al. A Framework for the Study of Complex mHealth Interventions in Diverse Cultural Settings. JMIR Mhealth Uhealth. 2017;5(4):e47.                                                                      | Canada  | Laurentian University                                                          | The Canadian Institutes of Health Research, Grand Challenges Canada, and the Global Alliance for Chronic Diseases | Health (mobile health interventions)                     | Researchers, designers, policy makers, stakeholders | Iterative            | Y (analysis and evaluation) | Y (analysis and evaluation) | P-MCE | Biomedical model, Psychological paradigm, Engineering paradigm |

|                                                                                    |                         |      |                                                                                                                                                                                                                    |        |                                                     |                                        |                                                  |                                       |                                |                             |                             |        |                                                                |
|------------------------------------------------------------------------------------|-------------------------|------|--------------------------------------------------------------------------------------------------------------------------------------------------------------------------------------------------------------------|--------|-----------------------------------------------------|----------------------------------------|--------------------------------------------------|---------------------------------------|--------------------------------|-----------------------------|-----------------------------|--------|----------------------------------------------------------------|
| Processes and recommendations for creating mHealth apps for low-income populations | Stephan <i>et al.</i>   | 2017 | Stephan LS, Dytz Almeida E, Guimaraes RB, Ley AG, Mathias RG, Assis MV, et al. Processes and Recommendations for Creating mHealth Apps for Low-Income Populations. JMIR Mhealth Uhealth. 2017;5(4):e41.            | Brazil | Fundação Universitária de Cardiologia, Porto Alegre | None                                   | Health (mhealth apps for low-income populations) | Designers, developers, researchers    | Iterative, Evolutive           | Y (analysis and evaluation) | Y (analysis and evaluation) | P-MCES | Psychological paradigm, Engineering paradigm                   |
| ACTS model                                                                         | Mohr <i>et al.</i>      | 2017 | Mohr DC, Lyon AR, Lattie EG, Reddy M, Schueller SM. Accelerating Digital Mental Health Research From Early Design and Creation to Successful Implementation and Sustainment. J Med Internet Res. 2017;19(5):e153.  | USA    | Northwestern University, Chicago                    | US National Institute of Mental Health | Health (mental health, ehealth)                  | Researchers, stakeholders             | Iterative, Evolutive, Parallel | Y (analysis and evaluation) | Y (analysis and evaluation) | P-MCES | Psychological paradigm, Engineering paradigm                   |
| User-centered design process                                                       | Vilardaga <i>et al.</i> | 2018 | Vilardaga R, Rizo J, Zeng E, Kientz JA, Ries R, Otis C, et al. User-Centered Design of Learn to Quit, a Smoking Cessation Smartphone App for People With Serious Mental Illness. JMIR Serious Games. 2018;6(1):e2. | USA    | Duke University, Durham                             | National Institute of Drug Abuse       | Health (smoking cessation, mental health)        | Researchers, developers, stakeholders | Iterative                      | Y (analysis and evaluation) | Y (analysis and evaluation) | P-MC   | Psychological paradigm, Engineering paradigm                   |
| 8-Step Scoping Framework                                                           | Davidson <i>et al.</i>  | 2019 | Davidson R, Randhawa G, Cash S. Identification of Complex Health Interventions Suitable for Evaluation: Development and Validation of the 8-                                                                       | UK     | University of Bedfordshire, Luton                   | University of Bedfordshire, Luton      | Health (complex interventions)                   | Researchers, clinicians, and users    | Iterative                      | Y (analysis and evaluation) | Y (analysis and evaluation) | P-MCE  | Biomedical model, Psychological paradigm, Engineering paradigm |

|       |                    |      |                                                                                                                                                                                          |         |                                  |          |                                       |                                                  |                      |                             |                             |        |                                                                |
|-------|--------------------|------|------------------------------------------------------------------------------------------------------------------------------------------------------------------------------------------|---------|----------------------------------|----------|---------------------------------------|--------------------------------------------------|----------------------|-----------------------------|-----------------------------|--------|----------------------------------------------------------------|
|       |                    |      | Step Scoping Framework. JMIR Res Protoc. 2019;8(3):e10075.                                                                                                                               |         |                                  |          |                                       |                                                  |                      |                             |                             |        |                                                                |
| TUDER | Wang <i>et al.</i> | 2019 | Wang Y, Fadhil A, Lange JP, Reiterer H. Integrating Taxonomies Into Theory-Based Digital Health Interventions for Behavior Change: A Holistic Framework. JMIR Res Protoc 2019;8(1):e8055 | Germany | University of Konstanz, Konstanz | SMARTACT | Health (digital health interventions) | Researchers, clinicians, government stakeholders | Iterative, Evolutive | Y (analysis and evaluation) | Y (analysis and evaluation) | P-MCES | Biomedical model, Psychological paradigm, Engineering paradigm |
